1 **Current sampling and sequencing biases of Lassa mammarenavirus limit**  
2 **inference from phylogeography and molecular epidemiology in Lassa Fever**  
3 **endemic regions.**

4  
5 **Authors**

6 Liã Bárbara Arruda<sup>1b#</sup>, Hayley Beth Free<sup>2a§</sup>, David Simons<sup>2§</sup>, Rashid Ansumana<sup>3</sup>, Linzy Elton<sup>1</sup>,  
7 Najmul Haider<sup>2c</sup>, Isobella Honeyborne<sup>1</sup>, Danny Asogun<sup>4</sup>, Timothy D McHugh<sup>1</sup>, Francine  
8 Ntoumi<sup>5,6</sup>, Alimuddin Zumla<sup>1,7</sup>, Richard Kock<sup>2</sup>

9  
10 **Affiliations**

11 <sup>1</sup> Centre for Clinical Microbiology, Division of Infection and Immunity, University College  
12 London, London, UK

13 <sup>2</sup> The Royal Veterinary College, University of London, Hatfield, UK.

14 <sup>3</sup> School of Community Health Sciences, Njala University, Bo, Sierra Leone

15 <sup>4</sup> Ekpoma and Irrua Specialist Teaching Hospital, Ambrose Alli University, Irrua, Nigeria.

16 <sup>5</sup> Fondation Congolaise pour la Recherche Médicale (FCRM), Brazzaville, Republic of Congo

17 <sup>6</sup> Institute for Tropical Medicine, University of Tübingen, Germany

18 <sup>7</sup> NIHR Biomedical Research Centre, UCL Hospitals NHS Foundation Trust, London, UK

19 <sup>a</sup> Current affiliation Oxford Brookes University, Oxford, UK

20 <sup>b</sup> Current affiliation Wellcome Connecting Science, Hinxton, UK

21 <sup>c</sup> Current affiliation School of Life Sciences, Faculty of Natural Sciences, Keele University,  
22 Staffordshire, United Kingdom

23 <sup>§</sup> Both authors contributed equality to this work

24 <sup>#</sup> Corresponding author

27 **Abstract**

28 Lassa fever (LF) is a potentially lethal viral haemorrhagic infection of humans caused by *Lassa*  
29 *mammarenavirus* (LASV). It is an important endemic zoonotic disease in West Africa with  
30 growing evidence for increasing frequency and sizes of outbreaks. Phylogeographic and  
31 molecular epidemiology methods have projected expansion of the Lassa fever endemic zone  
32 in the context of future global change. The Natal multimammate mouse (*Mastomys natalensis*)  
33 is the predominant LASV reservoir, with few studies investigating the role of other animal  
34 species. To explore host sequencing biases, all LASV nucleotide sequences and associated  
35 metadata available on GenBank (n = 2,298) were retrieved. Most data originated from Nigeria  
36 (54%), Guinea (20%) and Sierra Leone (14%). Data from non-human hosts (n = 703) were  
37 limited and only 69 sequences encompassed complete genes. We found a strong positive  
38 correlation between the number of confirmed human cases and sequences at the country level  
39 ( $r = 0.93$  (95% Confidence Interval = 0.71 - 0.98),  $p < 0.001$ ) but no correlation exists between  
40 confirmed cases and the number of available rodent sequences ( $r = -0.019$  (95% C.I. -0.71 -  
41 0.69),  $p = 0.96$ ). Spatial modelling of sequencing effort highlighted current biases in locations  
42 of available sequences, with increased effort observed in Southern Guinea and Southern  
43 Nigeria. Phylogenetic analyses showed geographic clustering of LASV lineages, suggestive  
44 of isolated events of human-to-rodent transmission and the emergence of currently circulating  
45 strains of LASV from the year 1498 in Nigeria. Overall, the current study highlights significant  
46 geographic limitations in LASV surveillance, particularly, in non-human hosts. Further  
47 investigation of the non-human reservoir of LASV, alongside expanded surveillance, are  
48 required for precise characterisation of the emergence and dispersal of LASV. Accurate  
49 surveillance of LASV circulation in non-human hosts is vital to guide early detection and  
50 initiation of public health interventions for future Lassa fever outbreaks.

51

52 **Key-words**

53 Lassa mammarenavirus; Lassa Fever; Phylogeography; Metadata; Zoonoses; Surveillance

54

55

## 56           **1 Introduction**

57

58    Lassa fever (LF) is a lethal zoonotic viral haemorrhagic disease of humans, caused by *Lassa*  
59    *mammarenavirus* (LASV). It causes an estimated 900,000 annual human infections and  
60    several thousand deaths in West Africa annually (1,2). The WHO assigns LASV endemicity to  
61    eight West African countries: Benin, Ghana, Guinea, Liberia, Mali, Sierra Leone, Togo and  
62    Nigeria (S1 Fig) (3). LASV is a bisegmented ssRNA- virus of the family Arenaviridae (4,5).  
63    Based on the genomic analysis of the large (L) and small segments (S) LASV has been  
64    classified into seven lineages which demonstrate spatial segregation across the endemic  
65    range (6). The high nucleotide variability (25-32%) of these lineages introduces complexity  
66    into assays to detect LASV infection.

67

68    Epidemiological data on LF is limited and constrained by current testing and reporting in the  
69    endemic region, making accurate estimates of its true burden challenging (7). Many individuals  
70    infected with LASV do not seek healthcare with up to 80% of infections assumed  
71    asymptomatic or presenting as mild illness (8). Estimates based on longitudinal serological  
72    surveys in Sierra Leone in the early 1980's indicated that 100,000 to 300,000 infections of LF  
73    occurred annually in West Africa, with more recent estimates being up to 900,000 infections  
74    (2,8). Identification of symptomatic cases is further confounded by overlapping symptoms with  
75    other diseases (e.g., malaria) and lack of available diagnostic methods (1,9–11). Access to  
76    diagnostic tests varies spatially, increased availability at centers of excellence in LF treatment  
77    and research such as the Irrua Specialist Teaching Hospital, Nigeria and Kenema General  
78    Hospital, Sierra Leone results in a spatial bias of reported cases from these locations.  
79    Phylogenetic analysis and molecular dating of sequence clinical and research samples  
80    suggest a westward route of dispersal of LASV lineages, from the most recent common  
81    ancestor in Nigeria. (12–18). These estimates have been used to project the potential for  
82    Lassa Fever to extend beyond the current endemic zone (19).

83

84    The Natal multimammate mouse (*Mastomys natalensis*) is the primary reservoir of LASV,  
85    however, 11 other rodent species have been found to be acutely infected or have seropositivity  
86    to LASV including; *Mastomys erythroleucus*, *Hylomyscus pamfi*, *Mus baoulei* and *Rattus*  
87    *rattus* (15,20–24). Humans become infected with LASV upon contact with or inhalation of  
88    excretions from the rodent species (12,25). Although human-to-human transmission has been  
89    reported – typically associated with nosocomial outbreaks – these are rare events when  
90    compared with spillover from rodent hosts (26). We performed a study of LASV nucleotide  
91    sequences available from the National Centre for Biotechnology Information (NCBI) GenBank,  
92    using associated metadata to spatially model sequencing effort, adjusted for the number of

93 suspected and confirmed human LF cases to determine potential biases in locations of  
94 available sequences or significant geographic limitations in LASV surveillance, particularly, in  
95 non-human hosts.

96

97

## 98 **2 Methods**

99

### 100 **2.1 Data Collection and Processing**

101

102 LASV nucleotide and protein sequences were obtained from the NCBI GenBank (27). The  
103 search query run on 24 Sep 2021 was for “Lassa mammarenavirus” in the organism field of  
104 the NCBI nucleotide dataset. Data were obtained using the NCBI Entrez API with analysis  
105 conducted using the “genbankr” package within the R statistical programming language (27–  
106 29). Associated citations were manually retrieved to identify missing metadata for sequences  
107 including hosts and geographic location of samples. Sequences with large portions (10%  
108 missing compared to reference sequences, NC\_004296.1 and NC\_004297.1 for S and L  
109 segments respectively) of missing nucleotide data on the L- or S-segment or lacking  
110 associated metadata (collection year, host species, country, and geographical region of  
111 sampling) were excluded from phylogenetic analysis. Nucleotide sequences were aligned  
112 using the ‘map to reference’ tool on Geneious Prime 20201.2. Alignment, visual inspection  
113 and manual editing were performed, and entries that contained >100 continuous ambiguous  
114 nucleotide calls were excluded (S1 Data).

115

### 116 **2.2 Sequencing Bias**

117

118 First, we compared the number of cases reported from countries between 2008-2023 with the  
119 number of samples contained in GenBank to summarise the correlation between reported  
120 human cases and availability of sequences. We then compared the proportion of human to  
121 non-human derived sequences within countries.

122

123 To understand the bias of sequenced samples at a sub-national level the origin of a sequenced  
124 sample was geocoded using the Google Geocoding API using the “ggmap” package (30).  
125 Sequence locations were associated with level-1 administrative regions and data were  
126 separated into human and rodent sources of samples to visualise the spatial heterogeneity of  
127 sampling. To measure sampling effort bias, the number of samples obtained within a level-1  
128 administrative region was associated with the centroid of the region. The number of confirmed  
129 LF clinical cases reported from these regions in the previous 15 years was obtained (S2 Data).

130 The number of cases within a region was divided by the human population count to produce  
131 the number of confirmed cases per 100,000 individuals. The number of sequences was used  
132 as the response variable in a spatial Generalised Additive Model, with geographic coordinates  
133 and cases per 100,000 individuals used as covariates. This model was constructed using the  
134 “mgcv” package (31).

135

### 136 2.3 Phylogenetic Analysis

137

138 Phylogenetic analysis was undertaken through Bayesian Markov Chain Monte Carlo (MCMC)  
139 method using BEAST.v1.10.4 (32). In BEAUTi, the parameters were a substitution model as  
140 a generalised time reversible plus gamma site heterogeneity, with codon partition positions 1,  
141 2, 3. A strict clock and a coalescent tree prior with a constant size population was used. Each  
142 analysis consisted of 20 million MCMC steps and trees were sampled every 20,000  
143 generations. Sample collection dates from the metadata were used as tip dates to fit to a  
144 molecular clock, and country of sample collection was incorporated as a discrete state (16,33).  
145 To assess the log files of the output TRACER.v.1.7.1 was used. Maximum-clade credibility  
146 trees were generated through TreeAnnotator v1.8.4 and visualised in FigTree.v1.4.4 (34).

147

## 148 3 Results

149

### 150 3.1 Compiled Dataset

151

152 The initial dataset comprised 2,298 records (from samples obtained 1969-2019), including  
153 nucleotide sequences and associated metadata. Incomplete gene sequences and sequences  
154 lacking metadata information (n = 1,045) were removed from phylogenetic analyses.  
155 Therefore, 680 sequences of complete S segment and 573 sequences of partial L segment (L  
156 protein only) were used. Accession numbers of included and excluded sequences are  
157 available in S1 Data.

158

### 159 3.2 Descriptive Analysis

160

161 Year of collection was available for 2,108 records, with the oldest sequence dating from 1969  
162 and latest from 2019. Among these records, most sequences (n = 1,936, 92%) have been  
163 obtained since 2008. Human-derived LASV sequences comprised most of the available  
164 records (67%), other host species include *Mastomys natalensis* (29%) and *Mastomys spp.*  
165 (3%), while *Mastomys erythroleucus* (n = 18), *Mus baoulei* (n = 9) and *Hylomyscus pamfi* (n =  
166 10) represent < 1% each. The species sampled was not documented in 107 records. Country

167 of collection was available for 2,238 records. Most sequences were produced from samples  
168 collected in Nigeria (54%), followed by Guinea (20%), Sierra Leone (14%), Liberia (4%) and  
169 Cote d'Ivoire (3%) with the remainder obtained from, Benin, Ghana, Mali and Togo (Fig 1).

170

171 Sequences for human derived samples with regional location data (n = 1328, 63%) were  
172 clustered in Edo State, Nigeria (n = 519, 39%), Ondo State, Nigeria (n = 220, 17%) and  
173 Eastern Province, Sierra Leone (n = 159, 12%) with 430 samples from the remaining endemic  
174 regions. Sequences from rodent samples with regional location data (n = 527, 25%) were most  
175 commonly obtained from Faranah, Guinea (n = 210, 39%) and Eastern Province, Sierra Leone  
176 (n = 107, 20%) with 210 samples from the regions.

177

## Human

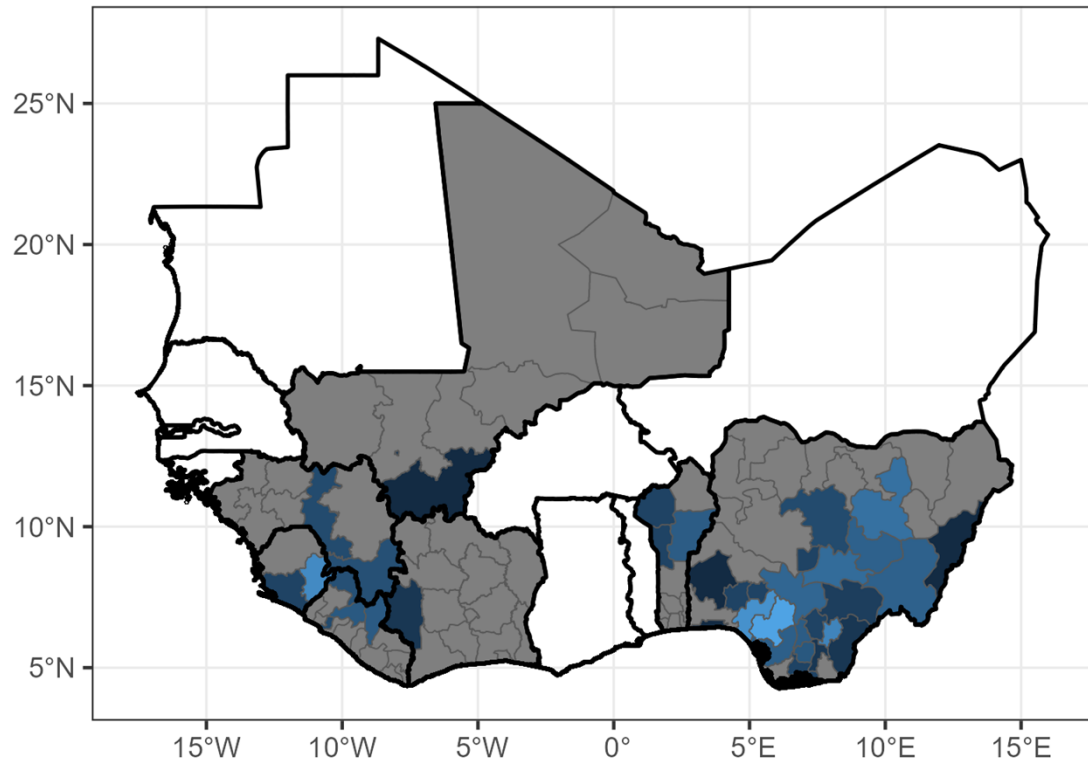

## Rodent

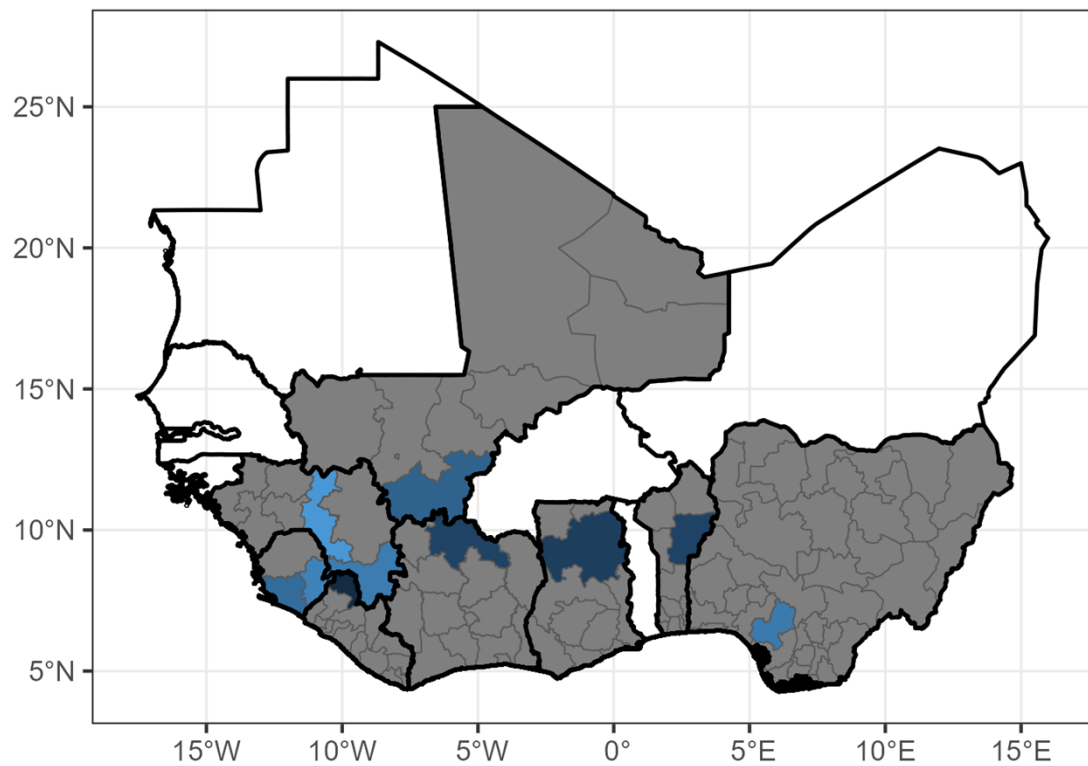

Number of sequences (log<sub>10</sub>)

0 1 2 3

179 Figure 1 – The number of sequences, shown on a  $\log_{10}$  scale, retrieved from NCBI GenBank  
180 with associated regional sampling location and host for human samples (top,  $n = 1,328$ ) and  
181 rodent samples (bottom,  $n = 527$ ). Grey regions represent level-1 administrative areas with no  
182 sequences within countries that have at least one available sequence. White countries are  
183 West African countries with no available LASV sequences. See S1 Fig for country names.  
184 Shapefiles for basemap layer obtained from GADM 4.0.2 (35)

185  
186

### 187 3.3 Sequencing bias

188

189 We observed a strong positive correlation between the number of confirmed human cases  
190 between 2008-2023 and the number of GenBank deposited sequences at country level  
191 ( $r(\text{degrees of freedom} = 7) = 0.93$  (95% Confidence Interval = 0.71-0.98),  $p < 0.001$ ). When  
192 analysed by species source no correlation was observed with the number of confirmed cases  
193 and the number of available rodent sequences was observed ( $r(6) = -0.019$  (95% C.I. -0.71-  
194 0.69),  $p = 0.96$ ).

195

196 When combining both human and rodent-derived samples at the regional level to explore  
197 spatial sampling biases, we found that sequencing effort is greatest in Southwest Nigeria,  
198 centred over Edo State and the Faranah and Nzérékoré regions of Guinea, Eastern Province  
199 of Sierra Leone and Nimba district of Liberia (Fig 2). There was a positive, non-linear  
200 association between the rate of confirmed human cases with the number of available rodent  
201 and human derived LASV sequences at regional level (deviance explained = 14%, estimated  
202 degrees of freedom = 2.29,  $p < 0.001$ ).

203



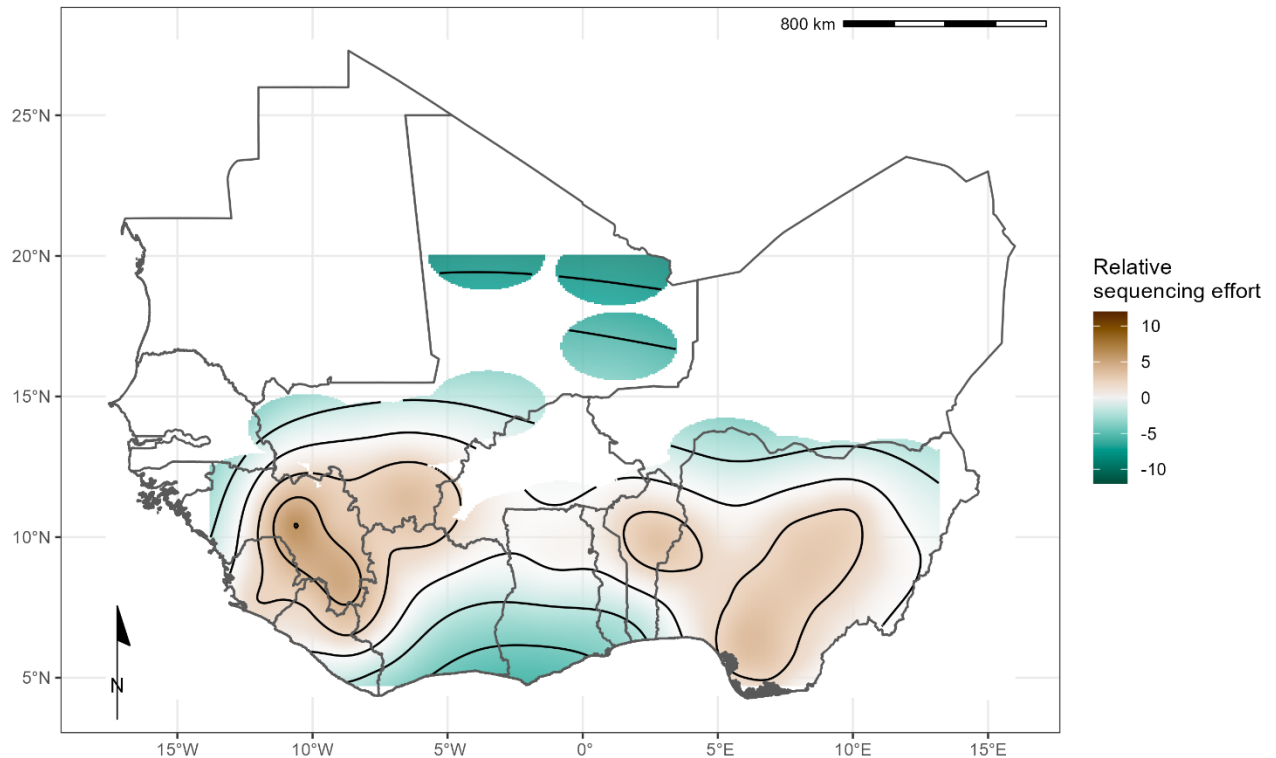

204

205 Figure 2 – Modelled relative sequencing effort derived from both human and rodent samples.  
206 Greatest sequencing effort coincides with areas where sampling in humans (Edo, Nigeria and  
207 Kenema, Sierra Leone) and rodents (Faranah, Guinea) have historically been focused.  
208 Shapefiles for basemap layer obtained from GADM 4.0.2 (35)

209

### 210 3.4 Phylogenetic Analysis

211

212 Sequences for each segment of LASV showed clustering according to previously documented  
213 lineages I-VII alongside geographical clustering with lineages I-III and VI present in Nigeria,  
214 IV in Liberia, Guinea and Sierra Leone, V in Mali and VII in Togo (S2 Fig). In this analysis only  
215 L segment sequences of lineage V from Cote d'Ivoire were included due to quality control  
216 exclusion criteria. The phylogeny of the L segment indicates an older emergence of LASV in  
217 the human population, with the most recent common ancestor (MRCA) predicted in the year  
218 828 in Nigeria, inference based on the S segment indicates the emergence in the year 1350  
219 (Table 1).

220

221 Table 1 - The most recent common ancestor (MRCA) stratified by host and country of  
 222 collection of *Lassa marmarenavirus* (LASV) S and L segments. Samples were collected  
 223 between 1969-2018.

| Host species                         | Country      | S segment MRCA | L segment MRCA |
|--------------------------------------|--------------|----------------|----------------|
| <i>Homo sapiens</i> (n=1181)         | Benin        | 1995           | 1989           |
|                                      | Guinea       | 1895           | 1871           |
|                                      | Liberia      | 1895           | 1627           |
|                                      | Nigeria      | 1681           | 1498           |
|                                      | Sierra Leone | 1901           | 1874           |
|                                      | Togo         | 2016           | 2014           |
| <i>Hylomyscus pamfi</i> (n=2)        | Nigeria      | 1681           | 1498           |
| <i>Mastomys erythroleucus</i> (n=18) | Guinea       | 1975           | 2010           |
|                                      | Nigeria      | 2008           | 2006           |
| <i>Mastomys natalensis</i> (n=36)    | Guinea       | 1938           | 1997           |
|                                      | Mali         | 1951           | 2007           |
|                                      | Sierra Leone | 1909           | 1979           |

224  
 225 There was a lack of sequence information from lineage I and VI, however, phylogeny suggests  
 226 these lineages are basal to others in Nigeria (S2 Fig). Lineage VII in Togo is most closely  
 227 related to Nigerian isolates and potentially diverged between 500-900 years ago. The  
 228 divergence of lineage III and IV is predicted to have occurred between the years 1332-1551.  
 229 Introduction to countries west of Nigeria appears to be by dispersal initially to Liberia, followed  
 230 by Guinea in the 1700s, followed by Sierra Leone and Mali approximately 100 years later. A  
 231 lack of full segment sequences from lineage V limits calculation of divergence from the most  
 232 recent common ancestor from lineage IV (approximately 200 years).

#### 235 4 Discussion

236  
 237 There are several important aspects of our study and findings. First, we studied a  
 238 comprehensive dataset of publicly available full-segment LASV sequences, spanning West  
 239 Africa and host species, to inform our understanding of the phylogeny of LASV dispersal.  
 240 Second, we identified substantial variability in the origin of available sequences and  
 241 completeness of records. Third, we showed strong geographic clustering among lineages  
 242 supporting prior hypotheses of radiation from both Nigeria and a subsequent introduction into  
 243 Liberia (19). Fourth, the synthesis of available metadata highlights important gaps in currently

244 available data, including spatial bias in the sequencing of samples and suggests this should  
245 be used to inform the design of epidemiological programmes going forward.

246

247 Our analyses of 2,298 LASV sequences obtained from GenBank highlights the spatial biases  
248 in the availability of sequence data that may limit our understanding of the current and historic  
249 dispersal of LASV lineages in West Africa. First, sequence data was typically obtained from  
250 three of the eight endemic countries: Nigeria, Guinea and Sierra Leone. We found a strong  
251 association between the number of reported human cases and number of available sequences.  
252 When stratifying by host species this trend did not remain with rodent derived samples  
253 showing no association with the number of human cases indicating important under-sampling  
254 in high human cases regions and relatively high sampling in locations with low numbers of  
255 human cases. This is potentially an important source of bias when attempting to infer  
256 phylogeography within the reservoir host of this zoonotic pathogen. Sequence data from other  
257 countries, and more regions within them, across West Africa are required to increase  
258 confidence in the timelines of the currently inferred westward expansion. Greater focus needs  
259 to be placed on acquiring sequences from the rodent host to understand viral genetic diversity  
260 within the primary reservoir species. Comparing rodent derived sequences with those  
261 acquired from spillover into human populations may also allow identification of genetic drivers  
262 of transmission (36).

263

264 The overrepresentation of data from these three countries has been mapped as relative  
265 sequencing effort to identify regions where increased LASV sequencing are required to  
266 counteract current sequencing biases. Second, geographic clustering of LASV lineages,  
267 suggest isolated events of human-to-rodent transmission and the emergence of LASV dating  
268 from 1498 in Nigeria. Similarly, Olayemi *et al.* report evidence of earlier emergence of the virus  
269 in humans than in rodents in Nigeria (16). Comparatively limited data from non-human hosts  
270 with limited genome coverage, (69/703 sequences encompassed complete genes) produce  
271 important uncertainty around the observation of human-to-rodent transmission. Taken  
272 together, this data highlight limited surveillance among animal species, necessitating further  
273 investments in data acquisition and sharing to accurately define the spatiotemporal expansion  
274 of LASV in West Africa.

275

276 The phylogenetic analysis of LASV stratified by host species supports spatial evolution, in  
277 addition to intra-host viral evolution (S2 Fig). For instance, LASV sequences from *M.*  
278 *erythroleucus* sampled in Nigeria and Guinea clustered within lineages III and IV, respectively.  
279 Interestingly, these isolates appear to occur after the emergence of the most recent common  
280 ancestor virus circulating among humans and *M. natalensis* in these countries (Table 1),

281 suggesting introduction of LASV into *M. erythroleucus* populations was a consequence of  
282 pathogen circulation in human and *M. natalensis* populations. Sequences from *M. natalensis*  
283 in Sierra Leone exhibit minimal clustering, and were interspersed with sequences from  
284 humans, potentially representing isolated events of pathogen introduction into human  
285 populations with spillback into commensal rodent populations (i.e., reverse zoonosis). The  
286 most recent common ancestor of LASV sequences from *M. natalensis* in Sierra Leone suggest  
287 a later emergence of the virus in this country. Our findings corroborate those of Olayemi et al.,  
288 that within Sierra Leone LASV appears to have emerged in human hosts before rodents (16).  
289 However, this data must be caveated by the limited information from rodent species in these  
290 locations.

291

292 There is a lower coverage of rodent-derived LASV sequences, with those from the primary  
293 reservoir *M. natalensis* forming fewer than one-third of all sequences ( $n = 642$ , 28%), with  
294 substantially lower sampling of other possible rodent hosts, including other *Mastomys* species.  
295 Rodent sampling has not increased at the same rate as human samples despite increased  
296 sampling effort since 2008 (15,22,37). There is substantial heterogeneity in the locations in  
297 which rodent and human samples are available. For example, a relatively high number of  
298 rodent samples ( $n = 429$ ) have been obtained from Guinea while few human sequences ( $n =$   
299  $20$ ) are available from these locations. The inverse is true of Nigeria where most human  
300 derived sequences are obtained ( $n = 1,147$ ) but only 85 rodent sequences are available, and  
301 all of these from a single state (Edo, Nigeria). The number of suspected and reported cases  
302 was found to be positively but non-linearly associated with the number of available sequences.  
303 This is suggestive of a consolidation of research and focus of sampling in areas historically  
304 with high numbers of human cases but has led to a paucity of sequences from elsewhere in  
305 the endemic region. The limited number of full segment sequences from rodents, from few  
306 geographic locations, limits our understanding of viral radiation in rodent hosts, particularly  
307 from species which are not considered the primary reservoir, e.g., *H. pamfi*. The most recent  
308 common ancestor for the viral sequence obtained from *H. pamfi* is estimated to be in the late  
309 1600s, it is therefore possible lineage VI and/or *H. pamfi* as a reservoir of LASV has gone  
310 undetected due to lack of sufficient sampling (15).

311

312 Interpreting available LASV sequences is challenging for several reasons. A large proportion  
313 of available sequences (70%) have been obtained within Lassa fever research programs,  
314 representing spatial ascertainment bias (38–40). In addition to these spatial biases' temporal  
315 biases are apparent. Since 2016 there has been a substantial increase in the number of LASV  
316 sequences available in NCBI GenBank, reflecting increasing research effort, availability of  
317 sequencing platforms and increased data collection during Lassa fever epidemics, such as in

318 the 2018 Nigeria Lassa fever outbreak (41–43). There are notably fewer recorded sequences  
319 of LASV from Benin, Togo, and Ghana, suggesting a potential a gap in surveillance and  
320 research capacity in these locations or a lack of circulating LASV, despite several reported  
321 outbreaks (44–46). Phylogenetic analysis on 60% of our initial dataset, following removal of  
322 sequences due to incompleteness or missing geographic and year of collection information ( $n$   
323 = 1,045) demonstrated geographic clustering of LASV lineages, supporting prior analyses  
324 (14–16,33,44,47–49). Increased data availability from Nigeria following increased LASV  
325 surveillance allowed regional analysis of phylogeny for lineages II and III supporting previous  
326 findings of expansion of these lineages from North-East Nigeria to the South-West of the  
327 country (13,50,51).

328

329 A substantial number ( $n = 869$ ) of the sequences retrieved corresponded to short fragments  
330 ( $< 1$  Kb) probably derived from PCR products used for diagnostic purposes rather than for  
331 viral genomic surveillance. LASV is a segmented virus, and it was not possible to identify  
332 complete genome sequences since both S and L segments are reported separately on the  
333 sequence's repository. The molecular clock analyses from L protein indicated an earlier  
334 emergence of LASV when compared to S segment analysis (828 and 1350 respectively),  
335 potentially because the viral RNA polymerase (L protein) is less affected by selective  
336 pressure than the S segment (12,47,52).

337

338 Despite these challenges, this study has synthesised currently available data on LASV  
339 sequences to investigate the location and period of sampling to reconstruct the dispersal of  
340 viral lineages across the endemic region. Despite the regionalisation of LF being driven by  
341 rodent-to-human transmission, there remains scarce LASV genomic data from non-human  
342 hosts. We have mapped the locations of relative under sampling to guide targeted efforts to  
343 counteract biases in currently available data for both rodent and human derived sequences.  
344 Expanded sampling of LASV from animal species within the endemic region will improve our  
345 current understanding of LASV evolution and ecology and improve confidence in current  
346 estimates of westward expansion of Lassa fever in humans. Further understanding of the  
347 viral evolution dynamics of LASV and spatial expansion of current lineages will be vital to  
348 ensure adequate diagnostic tools are available to respond to the expected sporadic  
349 outbreaks of Lassa Fever across the region.

350

351 **Supplementary material**

352

353 **S1 Data. GenBank accession number of analysed sequences.** This dataset includes  
354 available data about host, country, region, year, sequence length, genome segment (L or S)  
355 and predicted MRCA.

356

357 **S2 Data. Dataset on confirmed Lassa fever cases.** This presents the number of confirmed  
358 cases of Lassa fever reported from countries between 2008 and 2023 at a subnational level  
359 that were used to calculate the number of cases per 100,000 people. References for the  
360 reports used to produce this dataset are included.

361

362 **S1 Figure. Map of West Africa.** displays a map of West Africa with country names for  
363 reference with Fig 1 and Fig 2. Shapefiles for mapping obtained from GADM 4.0.2 (35)

364

365 **S2 Figure. Time-calibrated phylogeny for both the small segment (S) and large segment  
366 (L) from included LASV sequences.**

367

#### 368 **Author contributions**

369 Conceptualisation: DS and LBA; Methodology: HF, DS, DA and LBA; Formal Analyses: HF,  
370 DS and LBA; Investigation: HF, DS and LBA; Supervision: LBA; Data Curation: HF and DS;  
371 Writing – original draft preparation: HF, DS, LBA; Writing – Review and Editing: IH, LE, NH,  
372 RA, RK, FN, DA, AZ and TMcH; Funding acquisition: AZ and FN.

373

#### 374 **Data availability and reproducibility**

375 All data used in these analyses are publicly available from GenBank. The accession numbers  
376 of records used are available as supplementary material. Code to reproduce the metadata  
377 analyses are available as an archived Git release on Zenodo  
378 (<https://doi.org/10.5281/zenodo.6340162>)

379

#### 380 **Conflict of interests**

381 The authors declare no conflict of interests

382

#### 383 **Acknowledgements:**

384 Linzy Elton, Timothy D McHugh, Francine Ntoumi, and Alimuddin Zumla acknowledge support  
385 from EDCTP-Central Africa and East African Clinical Research Networks (CANTAM-3,  
386 EACCR-3). Sir Zumla is an NIHR Senior Investigator, a Mahathir Science Award, Sir Patrick  
387 Manson Medal and EU-EDCTP Pascoal Mocumbi Prize laureate. Liã Bárbara Arruda, David  
388 Simons, Rashid Ansumana, Linzy Elton, Najmul Haider, Isobella Honeyborne, Danny Asogun,  
389 Timothy D McHugh, Francine Ntoumi, Alimuddin Zumla and Richard Kock acknowledge

390 support from the Pan-African Network for Rapid Research, Response and Preparedness for  
391 Infectious Diseases Epidemics – PANDORA-ID-NET, funded through the European and  
392 Developing Countries Clinical Trials Partnership (EDCTP) (grant number RIA2016E-1609).  
393 David Simons is supported by a PhD studentship from the UK Biotechnology and Biological  
394 Sciences Research Council (BB/M009513/1).

395

## 396 **References**

- 397 1. Asogun DA, Gunther S, Akpede GO, Ihekweazu C, Zumla A. Lassa Fever: Epidemiology, Clinical  
398 Features, Diagnosis, Management and Prevention. [Review]. *Infectious Disease Clinics of North*  
399 *America*. 2019;33(4):933–51.
- 400 2. Basinski AJ, Fichet-Calvet E, Sjodin AR, Varrelman TJ, Remien CH, Layman NC, et al. Bridging the  
401 gap: Using reservoir ecology and human serosurveys to estimate Lassa virus spillover in West  
402 Africa. *Wesolowski A, editor. PLoS Comput Biol*. 2021 Mar 3;17(3):e1008811.
- 403 3. World Health Organisation. Lassa fever [Internet]. 2022 [cited 2022 Feb 22]. Available from:  
404 [https://www.who.int/health-topics/lassa-fever#tab=tab\\_1](https://www.who.int/health-topics/lassa-fever#tab=tab_1)
- 405 4. Gunther S, Lenz O. Lassa virus. [Review] [323 refs]. *Critical Reviews in Clinical Laboratory*  
406 *Sciences*. 2004;41(4):339–90.
- 407 5. Hallam SJ, Koma T, Maruyama J, Paessler S. Review of Mammarenavirus Biology and Replication.  
408 *Front Microbiol* [Internet]. 2018 [cited 2020 Oct 21];9. Available from:  
409 <https://www.frontiersin.org/articles/10.3389/fmicb.2018.01751/full>
- 410 6. Welch SR, Scholte FEM, Albariño CG, Kainulainen MH, Coleman-McCray JD, Guerrero LW, et al.  
411 The S Genome Segment Is Sufficient to Maintain Pathogenicity in Intra-Clade Lassa Virus  
412 Reassortants in a Guinea Pig Model. *Frontiers in Cellular and Infection Microbiology* [Internet].  
413 2018 [cited 2022 Feb 3];8. Available from:  
414 <https://www.frontiersin.org/article/10.3389/fcimb.2018.00240>
- 415 7. Simons D. Lassa fever cases suffer from severe underreporting based on reported fatalities.  
416 *International Health*. 2022;
- 417 8. McCormick JB, Webb PA, Krebs JW, Johnson KM, Smith ES. A prospective study of the  
418 epidemiology and ecology of Lassa fever. *J Infect Dis*. 1987;155(3):437–44.
- 419 9. Takah NF, Brangel P, Shrestha P, Peeling R. Sensitivity and specificity of diagnostic tests for Lassa  
420 fever: a systematic review. *BMC Infectious Diseases*. 2019 Jul 19;19(1):647.
- 421 10. Nnaji ND, Onyeaka H, Reuben RC, Uwishema O, Olovo CV, Anyogu A. The deuce-ace of Lassa  
422 Fever, Ebola virus disease and COVID-19 simultaneous infections and epidemics in West Africa:  
423 clinical and public health implications. *Tropical Medicine and Health*. 2021 Dec 30;49(1):102.
- 424 11. Ashcroft JW, Olayinka A, Ndodo N, Lewandowski K, Curran MD, Nwafor CD, et al. Pathogens that  
425 Cause Illness Clinically Indistinguishable from Lassa Fever, Nigeria, 2018. *Emerging Infectious*  
426 *Diseases*. 2022;28(5):994–7.
- 427 12. Andersen KG, Shapiro BJ, Matranga CB, Sealfon R, Lin AE, Moses LM, et al. Clinical Sequencing  
428 Uncovers Origins and Evolution of Lassa Virus. *Cell*. 2015;

- 429 13. Bowen MD, Rollin PE, Ksiazek TG, Hustad HL, Bausch DG, Demby AH, et al. Genetic Diversity  
430 among Lassa Virus Strains. *Journal of Virology*. 2000;74(15):6992–7004.
- 431 14. Manning JT, Forrester N, Paessler S. Lassa virus isolates from Mali and the Ivory Coast represent  
432 an emerging fifth lineage. *Frontiers in Microbiology*. 2015;
- 433 15. Olayemi A, Cadar D, Magassouba N, Obadare A, Kourouma F, Oyeyiola A, et al. New Hosts of The  
434 Lassa Virus. *Scientific Reports*. 2016;
- 435 16. Olayemi A, Adesina AS, Strecker T, Magassouba N, Fichet-Calvet E. Determining ancestry  
436 between rodent-and human-derived virus sequences in endemic foci: Towards a more integral  
437 molecular epidemiology of lassa fever within West Africa. *Biology*. 2020;
- 438 17. Whitmer SLM, Strecker T, Cadar D, Dienes HP, Faber K, Patel K, et al. New lineage of lassa virus,  
439 Togo, 2016. *Emerging Infectious Diseases*. 2018;24(3):599–602.
- 440 18. Okoro OA, Bamgboye E, Dan-Nwafor C, Umeokonkwo C, Ilori E, Yashe R, et al. Descriptive  
441 epidemiology of Lassa fever in Nigeria, 2012-2017. *Pan Afr Med J*. 2020 Sep 3;37:15.
- 442 19. Klitting R, Kafetzopoulou LE, Thiery W, Dudas G, Gryseels S, Kotamarthi A, et al. Predicting the  
443 evolution of Lassa Virus endemic area and population at risk over the next decades [Internet].  
444 *Microbiology*; 2021 Sep [cited 2022 Feb 3]. Available from:  
445 <http://biorxiv.org/lookup/doi/10.1101/2021.09.22.461380>
- 446 20. Bangura U, Buanie J, Lamin J, Davis C, Bongo GN, Dawson M, et al. Lassa Virus Circulation in  
447 Small Mammal Populations in Bo District, Sierra Leone [Internet]. Vol. 10, *BIOLOGY-BASEL. ST*  
448 *ALBAN-ANLAGE 66, CH-4052 BASEL, SWITZERLAND: MDPI*; 2021. Available from:  
449 <https://doi.org/10.3390/biology10010028>
- 450 21. Forni D, Sironi M. Population Structure of Lassa Mammarenavirus in West Africa. *Viruses*.  
451 2020;12(4):437.
- 452 22. Lecompte E, Fichet-Calvet E, Daffis S, Koulémou K, Sylla O, Kourouma F, et al. *Mastomys*  
453 *natalensis* and Lassa fever, West Africa. *Emerging Infectious Diseases*. 2006;
- 454 23. Wulff H, Fabiyi A, Monath TP. Recent isolations of Lassa virus from Nigerian rodents. *Bull World*  
455 *Health Organ*. 1975;52(4–6):609–13.
- 456 24. Yadouleton A, Agolinou A, Kourouma F, Saizonou R, Pahlmann M, Bedié SK, et al. Lassa virus in  
457 pygmy mice, Benin, 2016-2017. *Emerging Infectious Diseases*. 2019;
- 458 25. Oti VB. A Reemerging Lassa Virus: Aspects of Its Structure, Replication, Pathogenicity and  
459 Diagnosis. In: Alfonso J. Rodriguez-Morales, editor. *Current Topics in Tropical Emerging Diseases*  
460 *and Travel Medicine*. BoD – Books on Demand; 2018.
- 461 26. Lo Iacono G, Cunningham AA, Fichet-Calvet E, Garry RF, Grant DS, Khan SH, et al. Using  
462 Modelling to Disentangle the Relative Contributions of Zoonotic and Anthroponotic  
463 Transmission: The Case of Lassa Fever. *PLoS Neglected Tropical Diseases*. 2015;
- 464 27. National Center for Biotechnology Information. National Center for Biotechnology Information  
465 [Internet]. 2022 [cited 2022 Feb 3]. Available from: <https://www.ncbi.nlm.nih.gov/>
- 466 28. Becker G, Lawrence M. *genbankr: Parsing GenBank files into semantically useful objects*. 2021.



- 467 29. R Core Team. R: A Language and Environment for Statistical Computing [Internet]. Vienna,  
468 Austria: R Foundation for Statistical Computing; 2021. Available from: [https://www.R-](https://www.R-project.org/)  
469 [project.org/](https://www.R-project.org/)
- 470 30. Kahle D, Wickham H. ggmap: Spatial Visualization with ggplot2. *The R Journal*. 2013;5(1):144–61.
- 471 31. Wood SN. *Generalized Additive Models: An Introduction with R*. 2nd ed. Chapman and Hall/CRC;  
472 2017.
- 473 32. Suchard MA, Lemey P, Baele G, Ayres DL, Drummond AJ, Rambaut A. Bayesian phylogenetic and  
474 phylodynamic data integration using BEAST 1.10. *Virus Evolution*. 2018;
- 475 33. Olayemi A, Fichet-Calvet E. Systematics, ecology, and host switching: Attributes affecting  
476 emergence of the Lassa virus in rodents across western Africa. *Viruses*. 2020.
- 477 34. Rambaut A, Drummond AJ, Xie D, Baele G, Suchard MA. Posterior summarization in Bayesian  
478 phylogenetics using Tracer 1.7. *Systematic Biology*. 2018;
- 479 35. Database of Global Administrative Areas. GADM [Internet]. 2022 [cited 2021 Apr 25]. Available  
480 from: <https://gadm.org/index.html>
- 481 36. Whitlock AOB, Bird BH, Ghersi B, Davison AJ, Hughes J, Nichols J, et al. Identifying the genetic  
482 basis of viral spillover using Lassa virus as a test case. *R Soc Open Sci*. 2023 Mar 22;10(3):221503.
- 483 37. Lecompte E, Brouat C, Duplantier JM, Galan M, Granjon L, Loiseau A, et al. Molecular  
484 identification of four cryptic species of *Mastomys* (Rodentia, Murinae). *Biochemical Systematics*  
485 *and Ecology*. 2005;
- 486 38. Townsend Peterson A, Moses LM, Bausch DG. Mapping transmission risk of lassa fever in West  
487 Africa: The importance of quality control, sampling bias, and error weighting. *PLoS ONE*. 2014;
- 488 39. Ehichioya DU, Hass M, Ölschläger S, Becker-Ziaja B, Onyebuchi Chukwu CO, Coker J, et al. Lassa  
489 fever, Nigeria, 2005-2008. *Emerging Infectious Diseases*. 2010.
- 490 40. Khan SH, Goba A, Chu M, Roth C, Healing T, Marx A, et al. New opportunities for field research  
491 on the pathogenesis and treatment of Lassa fever. *Antiviral Research*. 2008;
- 492 41. Maxmen A. Deadly Lassa-fever outbreak tests Nigeria's revamped health agency. *Nature*.  
493 2018;555(7697):421–2.
- 494 42. Siddle KJ, Eromon P, Barnes KG, Mehta S, Oguzie JU, Odia I, et al. Genomic Analysis of Lassa  
495 Virus during an Increase in Cases in Nigeria in 2018. *New England Journal of Medicine*. 2018 Nov  
496 1;379(18):1745–53.
- 497 43. Ilori EA, Frank C, Dan-Nwafor CC, Ipadeola O, Krings A, Ukponu W, et al. Increase in Lassa Fever  
498 Cases in Nigeria, January–March 2018. *Emerging Infectious Diseases* [Internet]. 2019 May [cited  
499 2020 Oct 21];25(5). Available from: 10.3201/eid2505.181247
- 500 44. Yadouleton A, Picard C, Rieger T, Loko F, Cadar D, Kouthon EC, et al. Lassa fever in Benin:  
501 description of the 2014 and 2016 epidemics and genetic characterization of a new Lassa virus.  
502 *Emerging Microbes & Infections*. 2020;1–23.

- 503 45. World Health Organisation. Lassa Fever – Togo [Internet]. 2022 [cited 2022 Nov 24]. Available  
504 from: <https://www.who.int/emergencies/disease-outbreak-news/item/2022-DON362>
- 505 46. Ghana Health Services. Lassa Fever Press Release Ghana 2023. 2023 Apr 19 [cited 2023 Apr 19];  
506 Available from: <https://osf.io/ft2gy/>
- 507 47. Ibukun FI. Inter-lineage variation of lassa virus glycoprotein epitopes: A challenge to lassa virus  
508 vaccine development. *Viruses*. 2020.
- 509 48. Lalis A, Leblois R, Lecompte E, Denys C, ter Meulen J, Wirth T. The Impact of Human Conflict on  
510 the Genetics of *Mastomys natalensis* and Lassa Virus in West Africa. *PLoS ONE*. 2013;7(5).
- 511 49. Wiley MR, Fakoli L, Letizia AG, Welch SR, Ladner JT, Prieto K, et al. Lassa virus circulating in  
512 Liberia: a retrospective genomic characterisation. *The Lancet Infectious Diseases*. 2019;
- 513 50. Ehichioya DU, Hass M, Becker-Ziaja B, Ehimuan J, Asogun DA, Fichet-Calvet E, et al. Current  
514 molecular epidemiology of Lassa virus in Nigeria. *Journal of Clinical Microbiology*. 2011;
- 515 51. Naidoo D, Ihekweazu C. Nigeria's efforts to strengthen laboratory diagnostics – Why access to  
516 reliable and affordable diagnostics is key to building resilient laboratory systems. *African Journal*  
517 *of Laboratory Medicine* [Internet]. 2020 Aug 26 [cited 2020 Oct 21];9(2). Available from:  
518 [10.4102/ajlm.v9i2.1019](https://doi.org/10.4102/ajlm.v9i2.1019)
- 519 52. Hastie KM, Saphire EO. Lassa virus glycoprotein: stopping a moving target. *Current Opinion in*  
520 *Virology*. 2018.
- 521

# Human

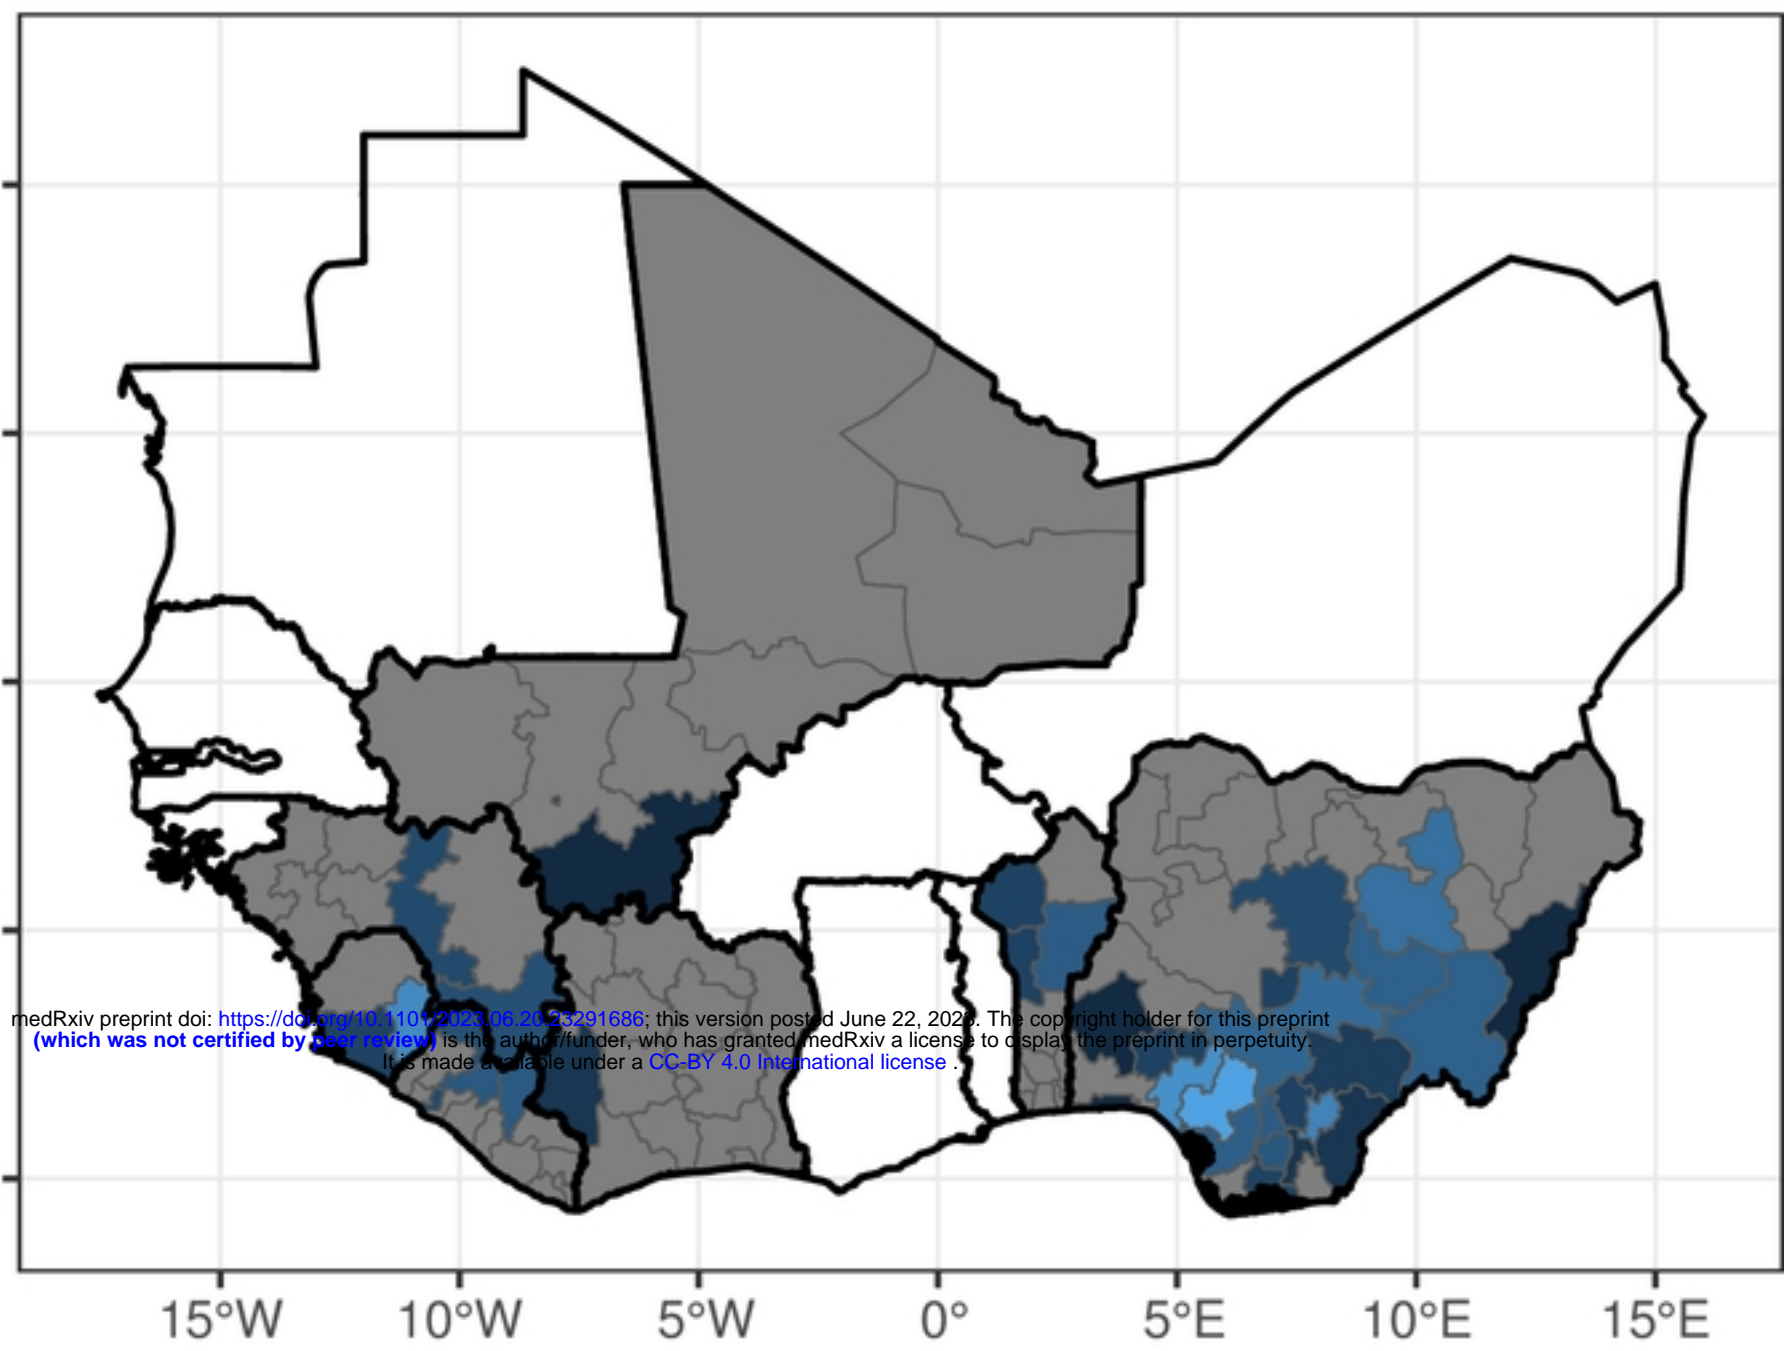

# Rodent

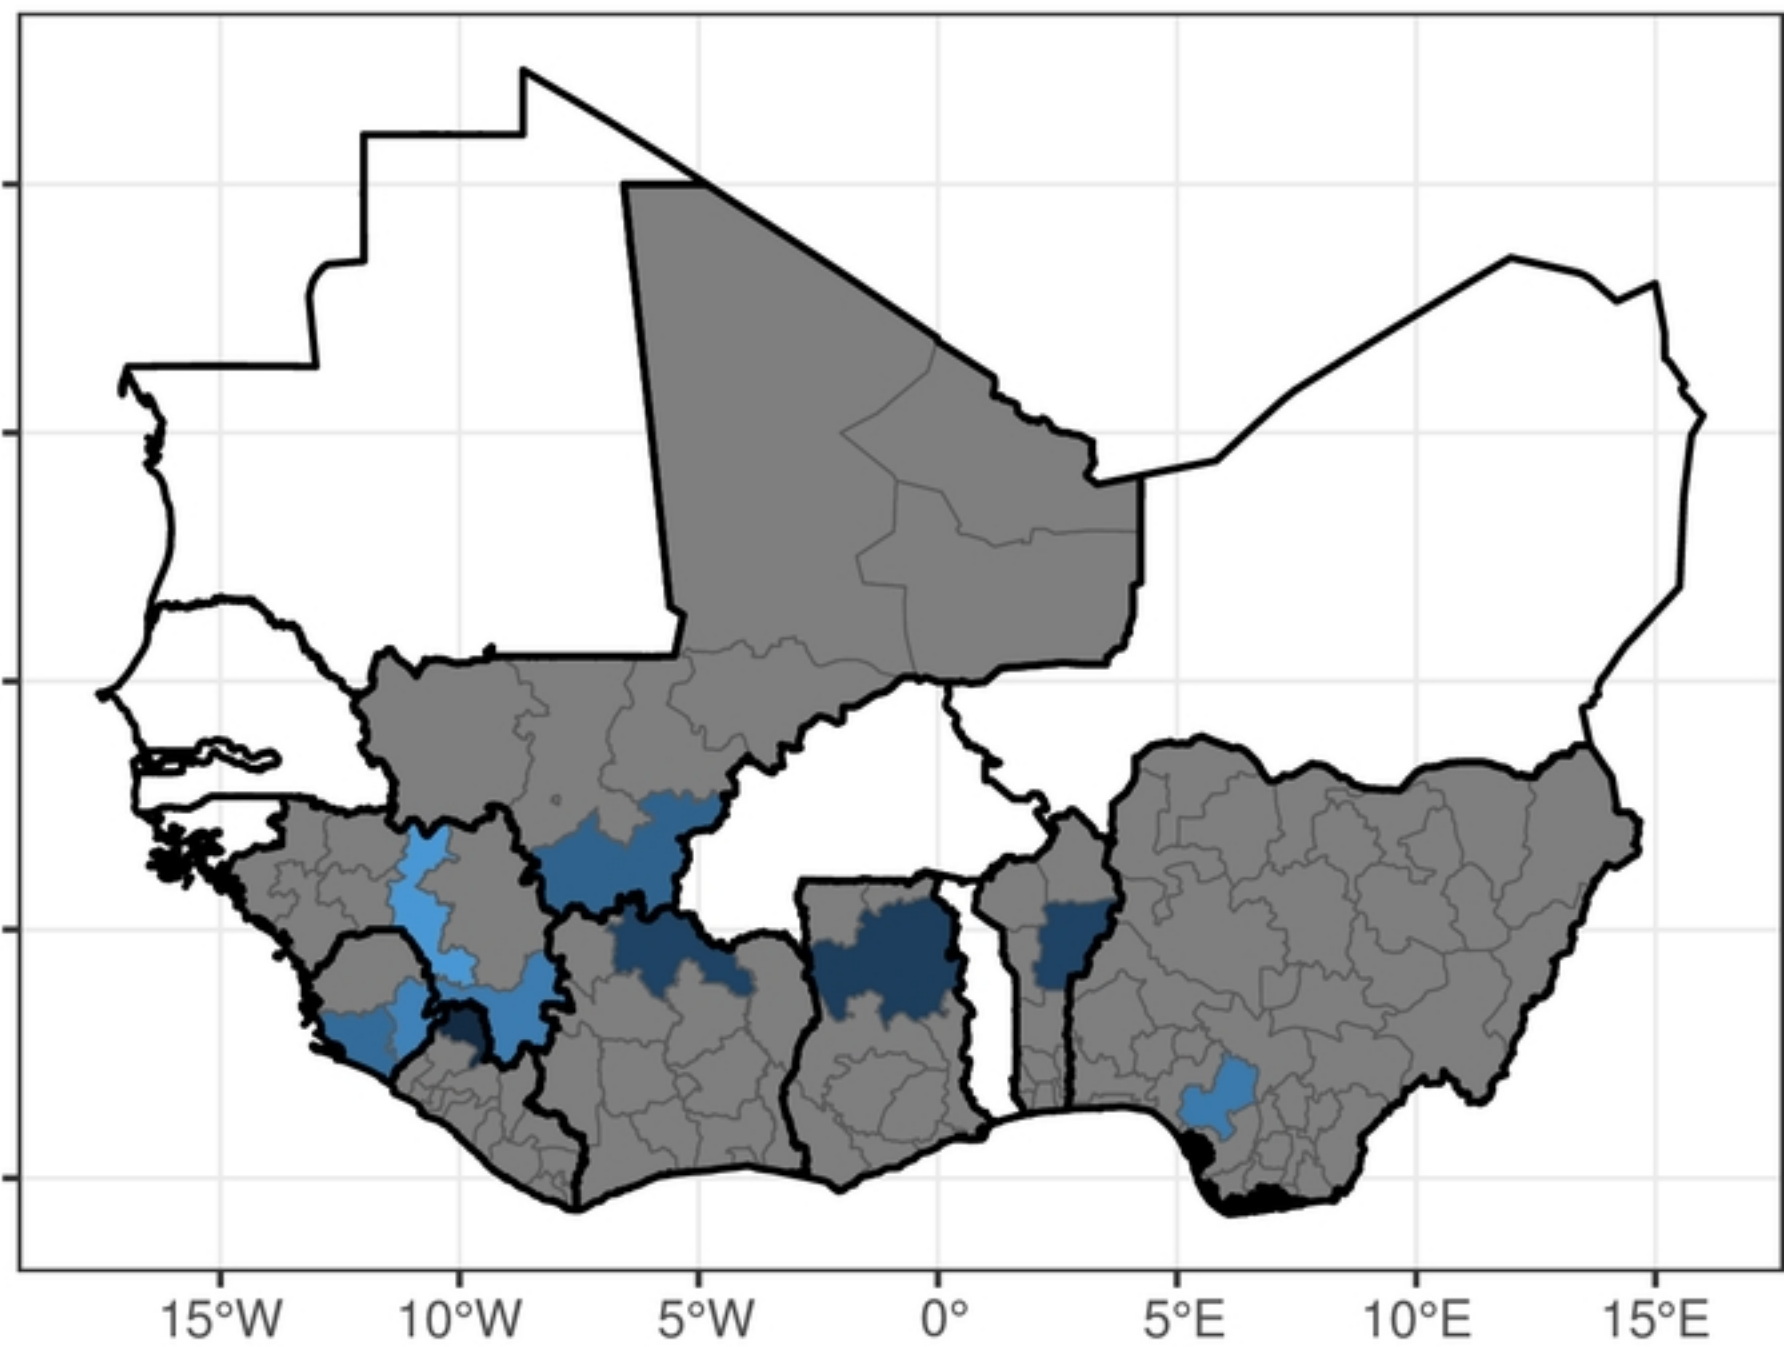

Number of sequences (log<sub>10</sub>)

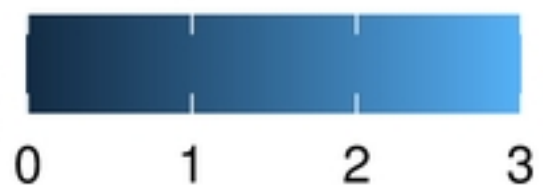

Figure 1

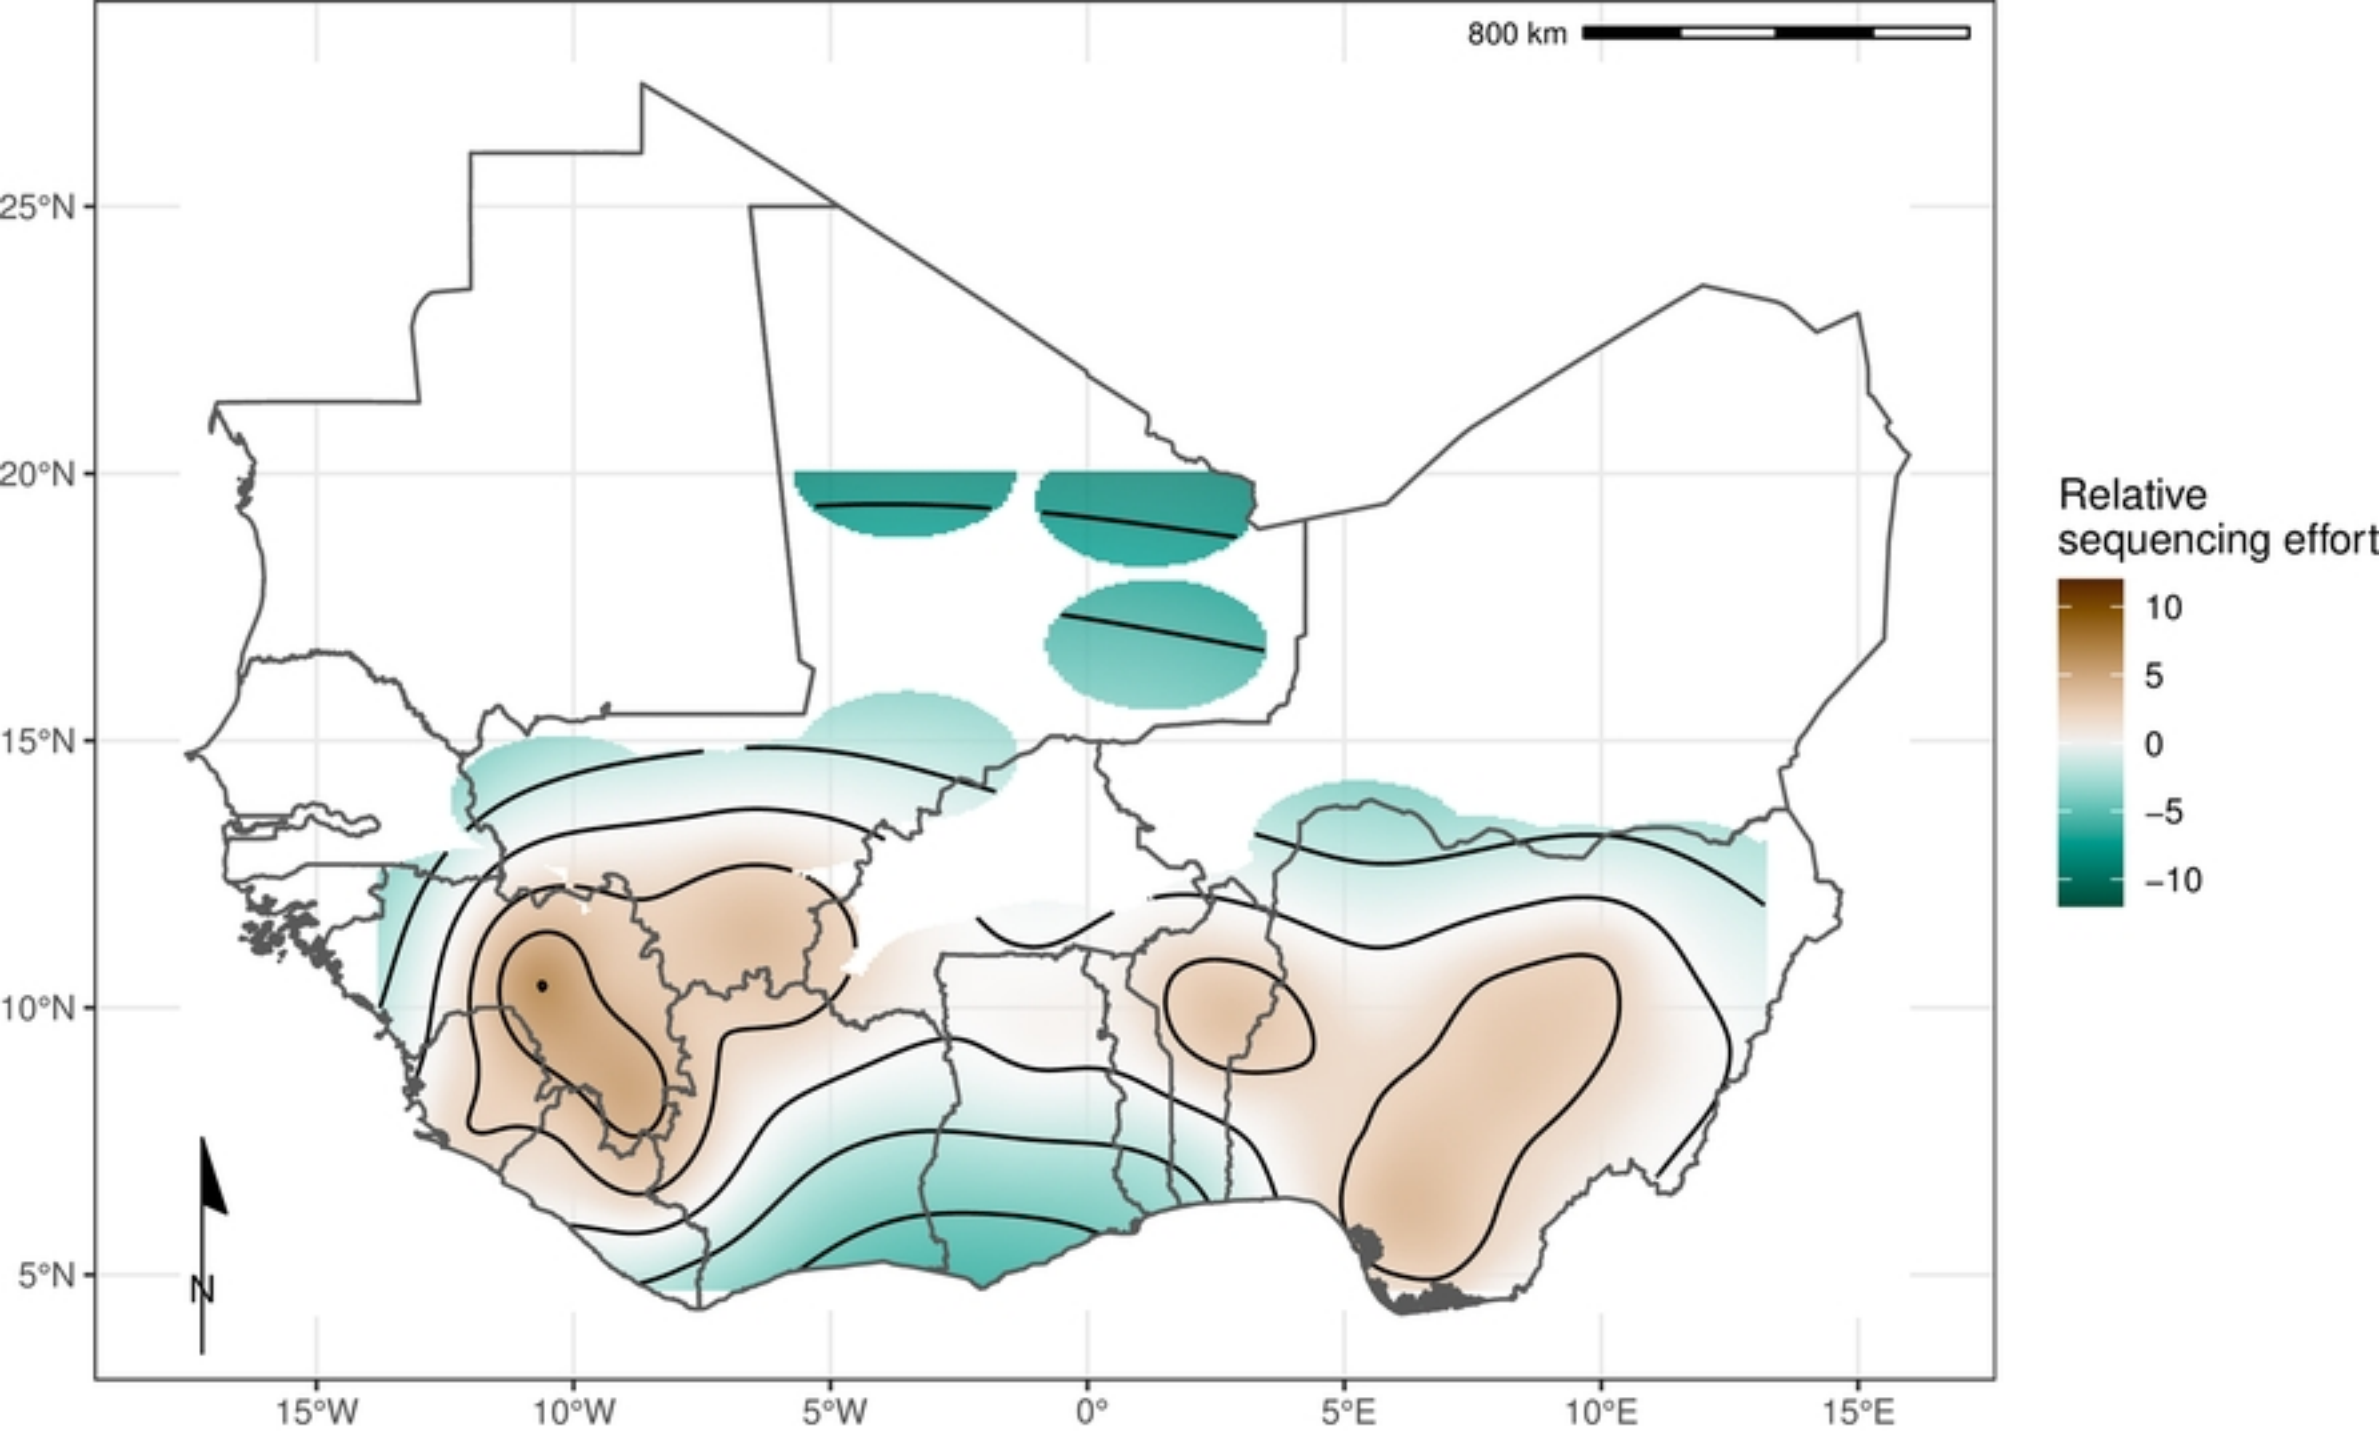

Figure 2
